# Supplementary material
Source: Royal Society of Chemistry journal article supplement (https://www.rsc.org/suppdata/books/178801/9781788018623/bk9781788018623-committee.pdf)
Supplement: Supplementary file 1 [file bk9781788018623-committee.pdf]

## Conference Committee Members

### Scientific Committee

Dr Mayur C. Yergeri, SVKM's NMIMS University, Mumbai  
Dr Rakesh N Veedu, Murdoch University, Perth, Australia  
Dr Vigneshwaran Namasivayam, University Bonn, Germany  
Dr Anke Schiedel, University Bonn, Germany  
Dr Sven marcel Stefan, University Bonn, Germany  
Dr Johan Viljanen, Uppsala University, Sweden  
Dr Amit Sharad, NIPER Ahmedabad, India  
Dr Suresh Kumar M, JSS University, India  
Dr Sarasija Suresh, Institute for Drug Delivery and Biomedical Research, India  
Dr Bhagawati Saxena, Nirma Univesity, India  
Dr Shvetank Bhatt, Amity University, India  
Dr Anil K Agarwal, CHRIST University, India  
Dr Yogesh Anant Kulkarni, NMIMS University, India  
Dr Maushmi Shailesh Kumar, NMIMS University, India  
Dr Manjula Das, Mazumdar Shaw Medical Center, India

### Associate Editors

Dr Rohini Keshava, Department of Biotechnology, RUAS  
Dr Sunil Kumar Y.C, Department of Chemistry, RUAS  
Dr Bindu S, Ramaiah Institute of Technology, Bangalore  
Dr Shravanti, Ramaiah Institute of Technology, Bangalore  
Dr Rajeev J. Mudakavi, Department of Pharmaceutics, RUAS  
Dr Maheswari E, Department of Pharmacy Practice, RUAS  
Dr Mamatha K, Department of Pharmacy Practice, RUAS  
Dr Ann Mary Swaroop, Department of Pharmacy Practice, RUAS  
Dr Lakshmi Prasanna M, Department of Pharmacy Practice, RUAS  
Dr Sundara Saravanan K, Department of Pharmacognosy, RUAS  
Dr Sindhu Abraham, Department of Pharmaceutics, RUAS  
Dr Pudi Chiranjeevi, Department of Pharmacy Practice, RUAS  
Mrs Sharon Caroline Furtado, Department of Pharmaceutics, RUAS  
Mrs Swetha K, Department of Pharmaceutics, RUAS  
Ms Hajira Banu H, Department of Pharmacology, RUAS  
Mr Subeesh K. Viswam, Department of Pharmacy Practice, RUAS
